# Supplementary material
Source: MDPI journal article supplement (https://www.mdpi.com/2673-9623/4/1/5)
Supplement: s1 [file s1]

# Supplementary Materials: Green Extraction of Oleoresin from Pink Pepper Fruits: Effect of Experimental Conditions and Characterization

Ana Flávia A. de Mello, Jaqueline Hoscheid, Djéssica T. Raspe, Natália Stevanato and Camila da Silva

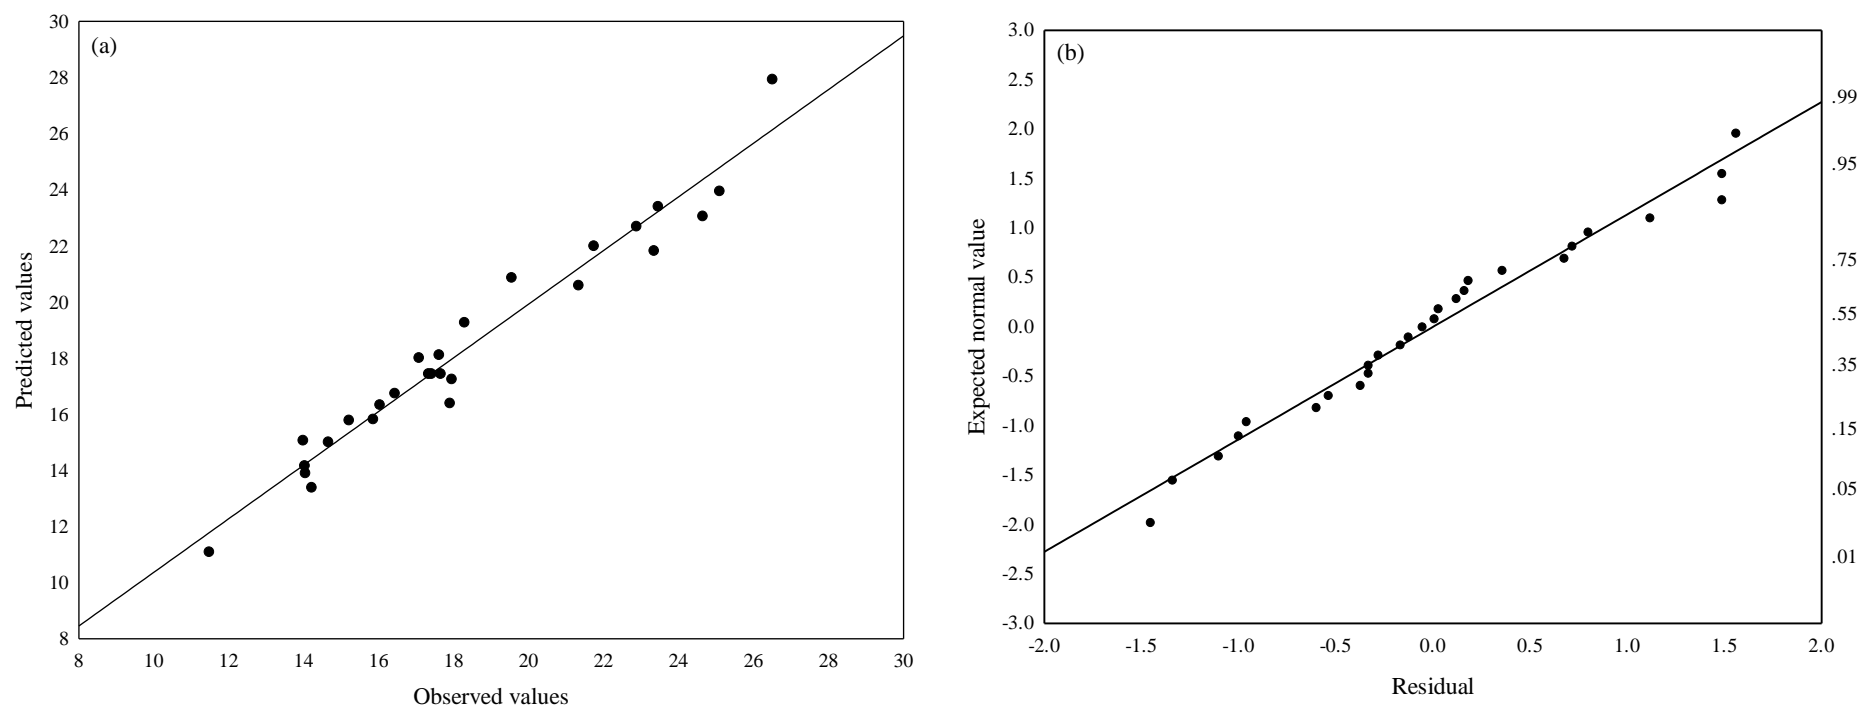

**Figure S1.** Diagnosis charts for adequacy of the global extraction yield ( $Y_{GE}$ ) model. (a) Predicted versus observed value; (b) Residual normal probability plot.

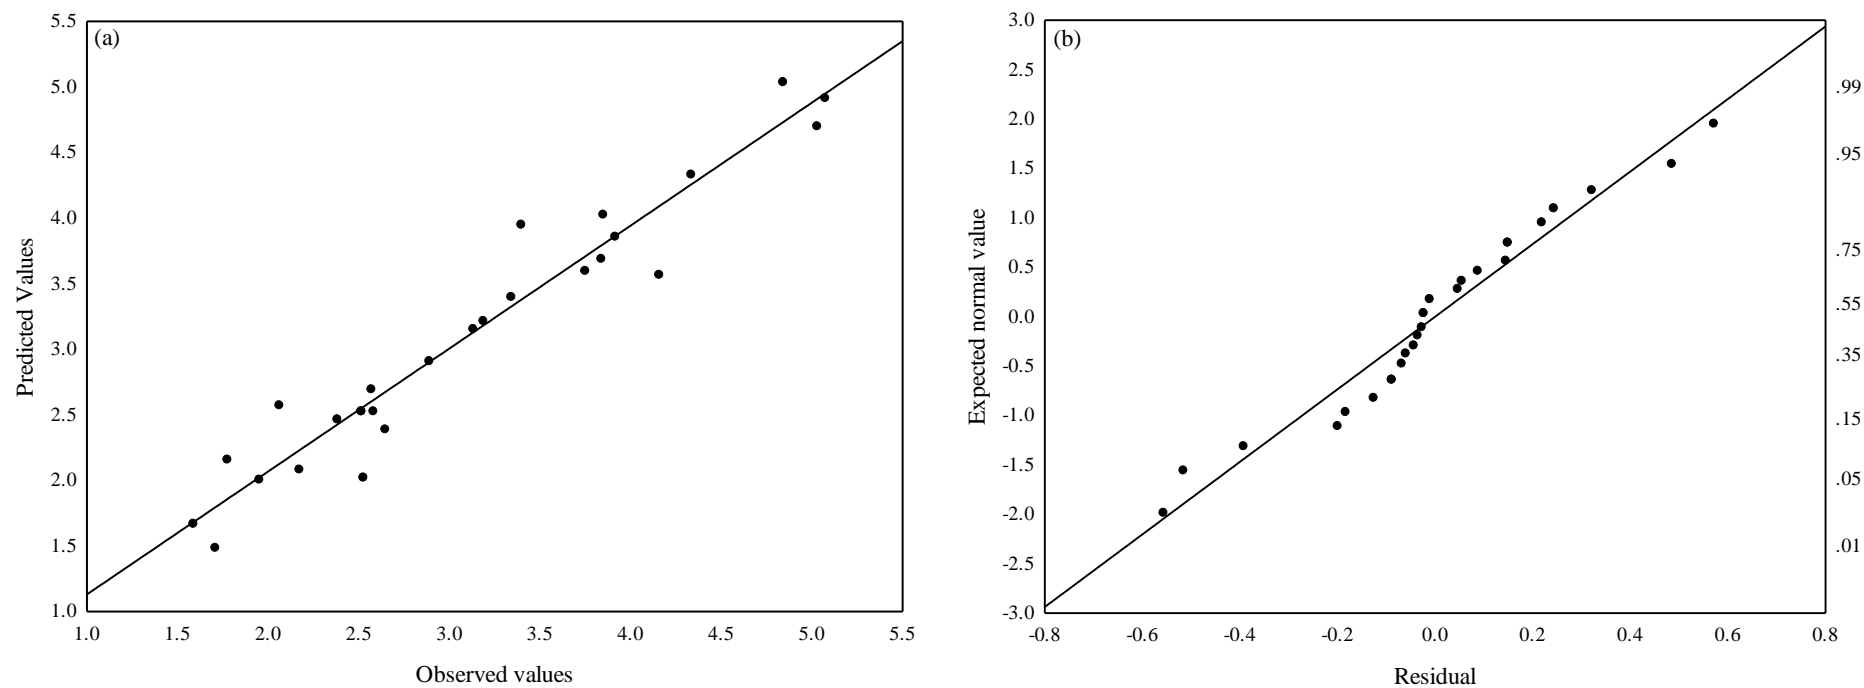

**Figure S2.** Diagnosis charts for adequacy of the phenolic compounds yield ( $Y_{PC}$ ) model. (a) Predicted versus observed value; (b) Residual normal probability plot.
